# Supplementary material
Source: Springer Nature journal article supplement (https://www.springermedizin.de/resource/supplementary/13075_2011_3633_MOESM6_ESM.pdf/9694934)

**A**  $1 \times 10^5$  cells/aggregate  
25 100 aggregates

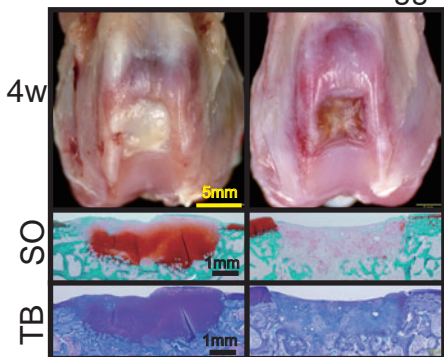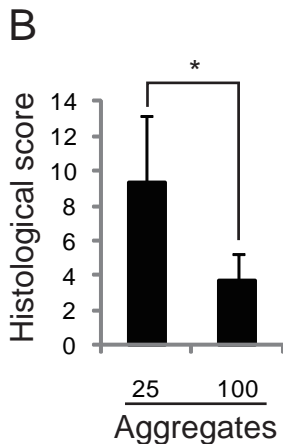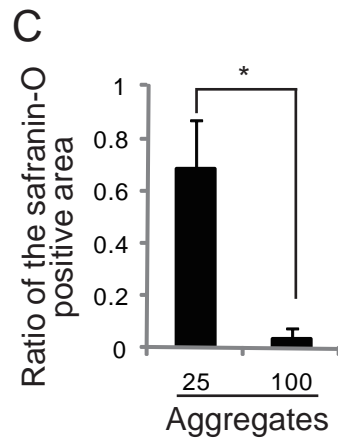

**D** 10 80 aggregates

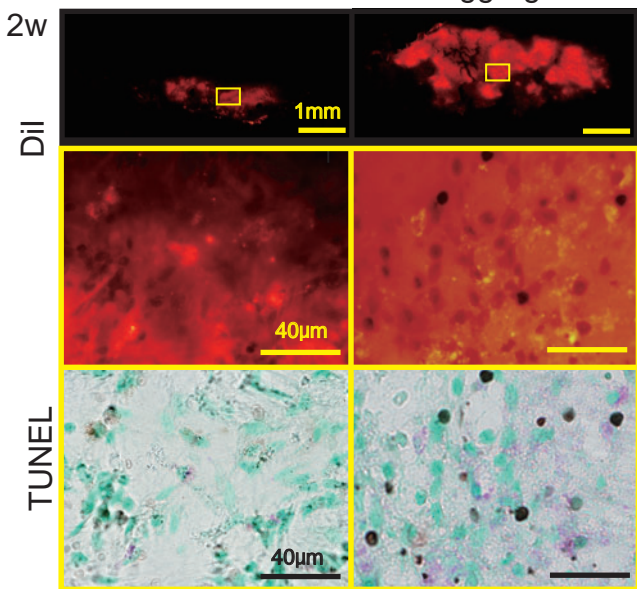

**E** 1 40 aggregates

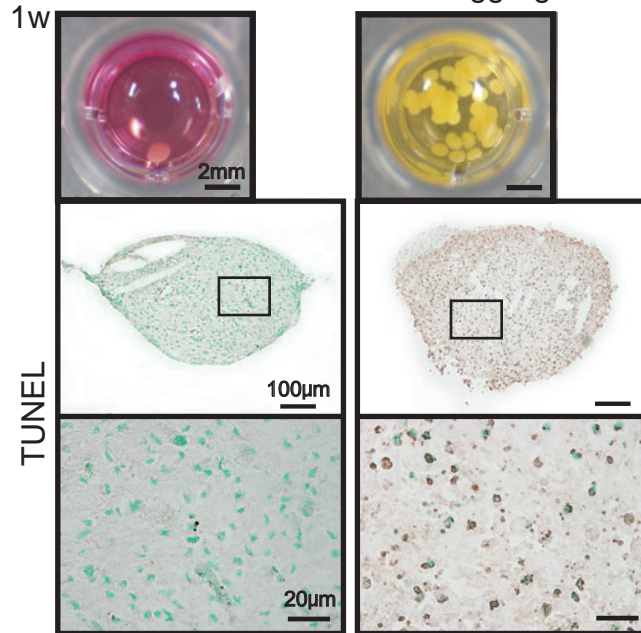

Supplement: MOESM6 [file 9694934]
